# Supplementary material for: Light-Stimulated IGZO Transistors with Tunable Synaptic Plasticity Based on Casein Electrolyte Electric Double Layer for Neuromorphic Systems
Source: MDPI journal article supplement (doi:10.3390/biomimetics8070532), 2023-11-09
Supplement: s1 [file s1]

# **Supplementary Materials**

## **Light-Stimulated IGZO Transistors with Tunable Synaptic Plasticity Based on Casein Electrolyte Electric Double Layer for Neuromorphic Systems**

**Hwi-Su Kim <sup>1</sup>, Hamin Park <sup>2</sup> and Won-Ju Cho <sup>1,\*</sup>**

<sup>1</sup> Department of Electronic Materials Engineering, Kwangwoon University, Gwangun-ro 20, Nowon-gu, Seoul 01897, Republic of Korea; hwsu0811@naver.com

<sup>2</sup> Department of Electronic Engineering, Kwangwoon University, Gwangun-ro 20, Nowon-gu, Seoul 01897, Republic of Korea; parkhamin@kw.ac.kr

\* Correspondence: chowj@kw.ac.kr; Tel.: +82-2-940-5163

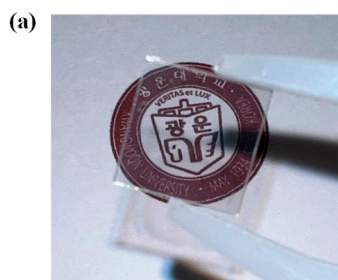

**Figure S1.** (a) Optical image of IGZO optoelectronic synaptic transistor with a casein electrolyte-based EDL.

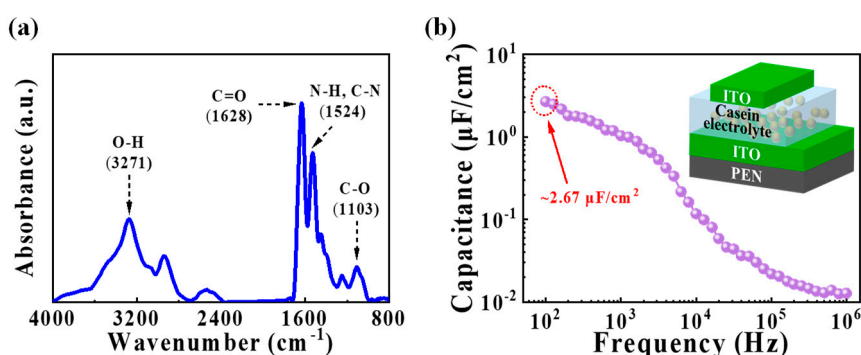

**Figure S2.** (a) FTIR spectra of the casein electrolyte film ranging in wavenumber from 4000  $\text{cm}^{-1}$  and 800  $\text{cm}^{-1}$ . (b)  $C$ - $f$  characteristics of the casein electrolyte film using ITO/casein electrolyte-based EDL/ITO capacitor with frequency from 100 Hz to  $10^6$  Hz.

Figure S2a shows the analyzed chemical compositions of the casein electrolyte film. The broad peak at 3271  $\text{cm}^{-1}$  is attributed to the O-H stretching. The peak near 1628  $\text{cm}^{-1}$  is related to the C=O stretching. The peak at 1524  $\text{cm}^{-1}$  is due to the N-H bending and C-N stretching, respectively. The peak at 1103  $\text{cm}^{-1}$  is caused by the C-O stretching [1–3].

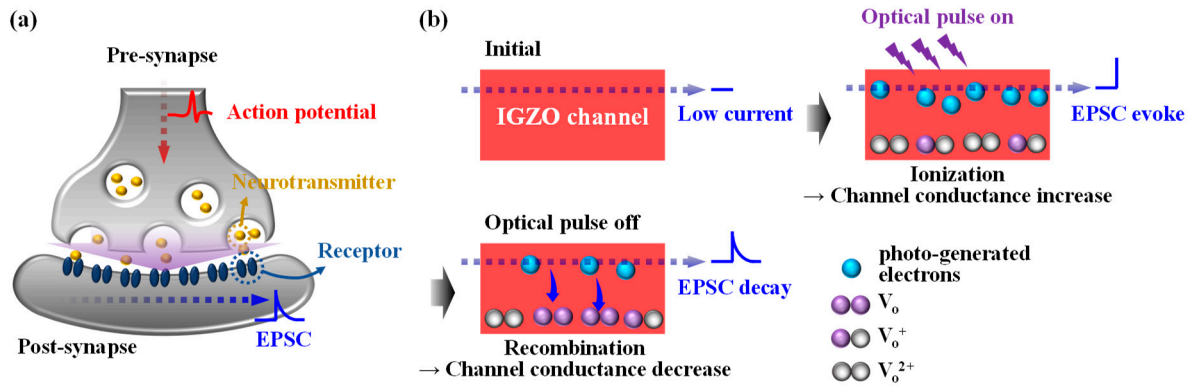

**Figure S3.** Schematic of (a) biological synapse, and (b) EPSC evoked mechanism by the optical pulse in the proposed device.

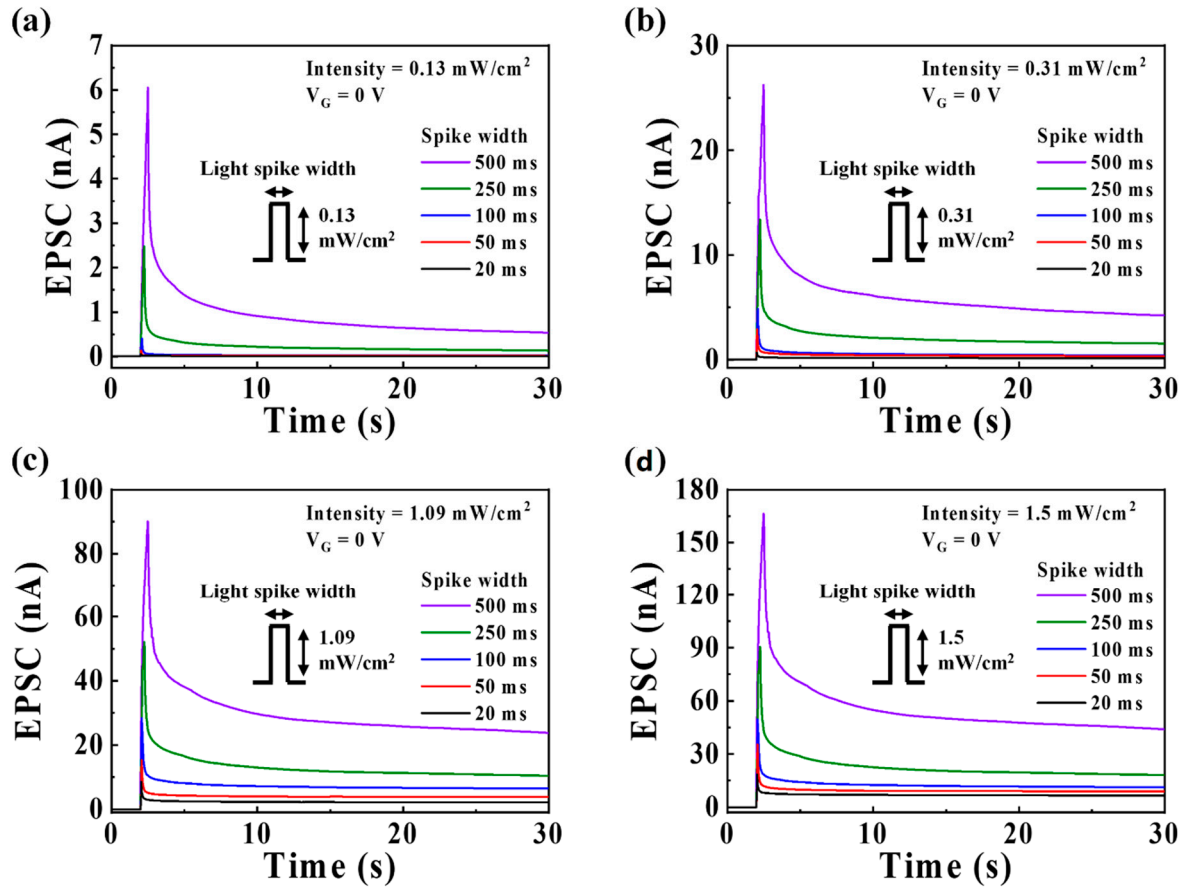

**Figure S4.** EPSC evoked by a single pre-synaptic optical spike (395 nm) with different light intensities of (a) 0.13 mW/cm<sup>2</sup>, (b) 0.31 mW/cm<sup>2</sup>, (c) 1.09 mW/cm<sup>2</sup>, and (d) 1.5 mW/cm<sup>2</sup> for different spike widths (from 20 ms to 500 ms).

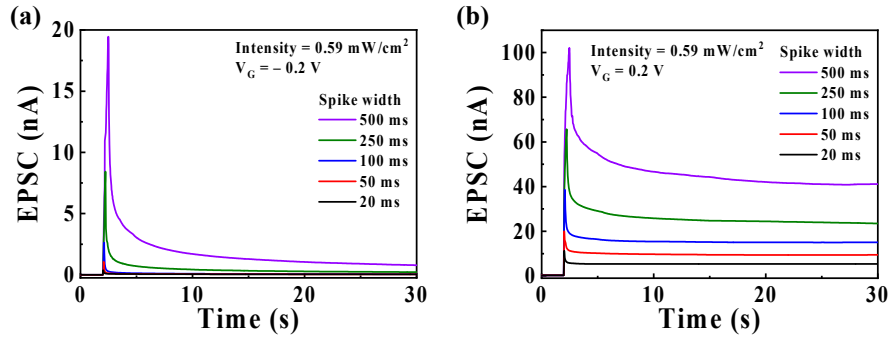

**Figure S5.** EPSC triggered by a single pre-synaptic optical spike ( $395 \text{ nm}$ ,  $0.59 \text{ mW/cm}^2$ ) for different spike widths (from  $20 \text{ ms}$  to  $500 \text{ ms}$ ) under (a)  $V_G$  of  $-0.2 \text{ V}$  and (b)  $V_G$  of  $0.2 \text{ V}$ .

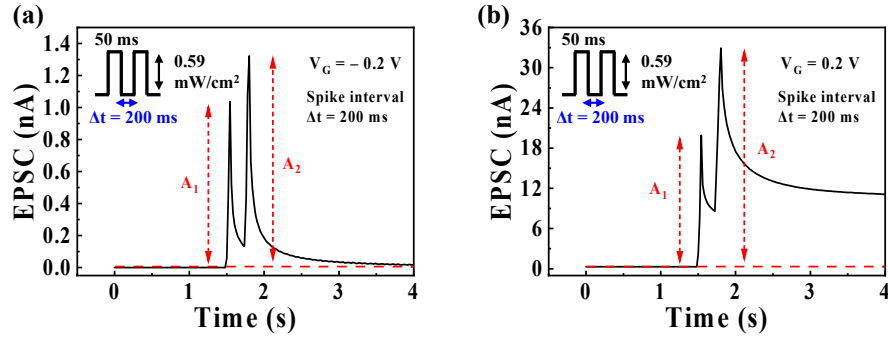

**Figure S6.** EPSCs triggered by paired optical spikes ( $0.59 \text{ mW/cm}^2$ ,  $50 \text{ ms}$ ) with  $\Delta t$  of  $200 \text{ ms}$  under (a)  $V_G$  of  $-0.2 \text{ V}$  and (b)  $V_G$  of  $0.2 \text{ V}$ .

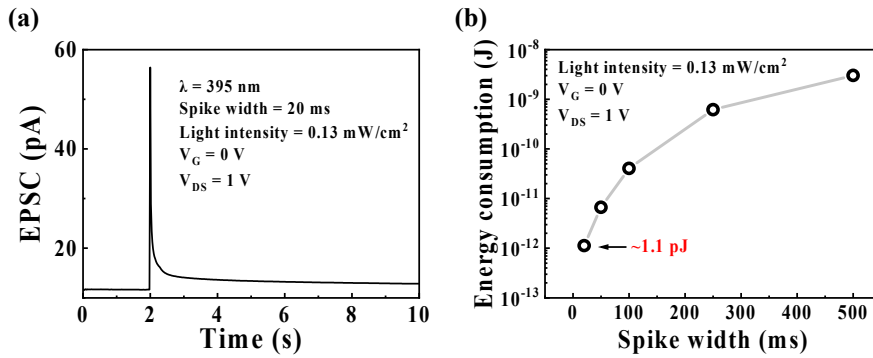

**Figure S7.** (a) EPSC showing minimum energy consumption for an optical spike ( $0.13 \text{ mW/cm}^2$ ,  $20 \text{ ms}$ ). (b) The energy consumption against the spike width.

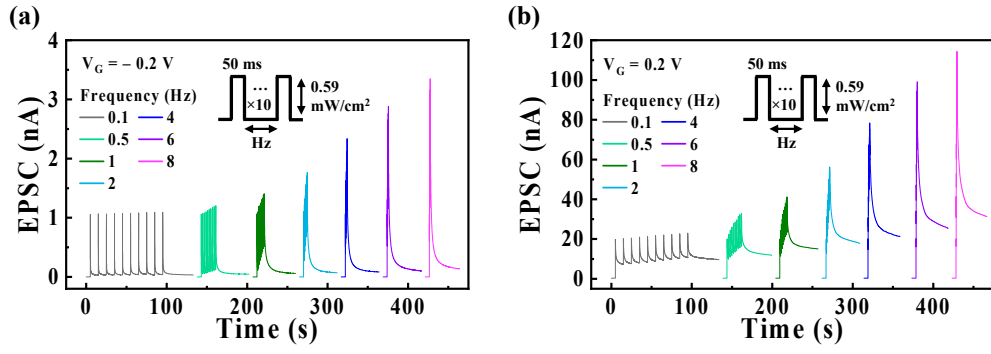

**Figure S8.** SRDP behavior triggered by sequential 10 pre-synaptic optical spikes (0.59 mW/cm<sup>2</sup>, 50 ms) with various frequencies from 0.1 Hz to 8 Hz under (a)  $V_G$  of -0.2 V and (b)  $V_G$  of 0.2 V.

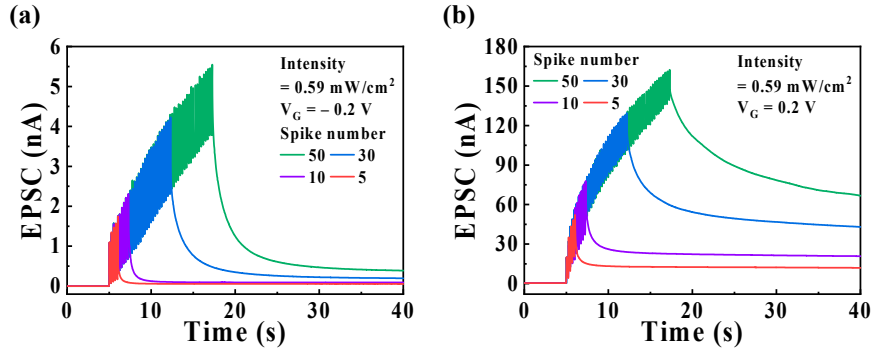

**Figure S9.** SNDP behaviors with various numbers of optical spikes (0.59 mW/cm<sup>2</sup>, 50 ms) under (a)  $V_G$  of -0.2 V and (b)  $V_G$  of 0.2 V.

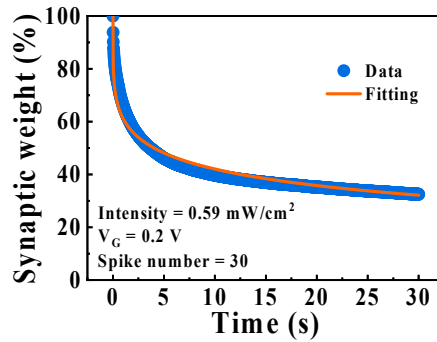

**Figure S10.** Synaptic weight decay characteristic fitted with a stretched exponential function (Eq. 2).

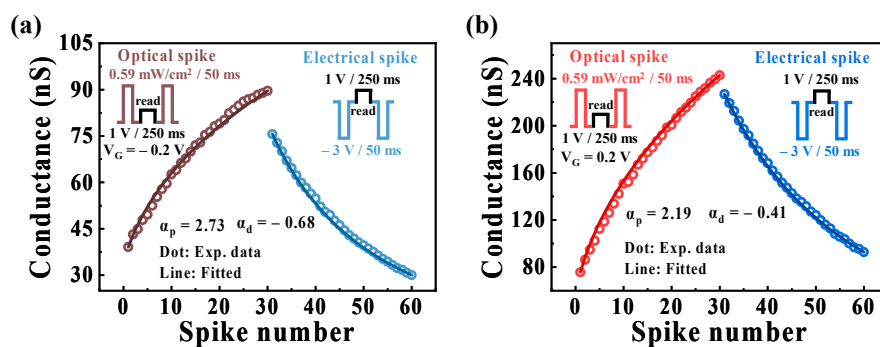

**Figure S11.** P/D characteristics for optical potentiation spike ( $0.59 \text{ mW/cm}^2$ , 50 ms) under (a)  $V_G$  of -0.2 V and (b)  $V_G$  of 0.2 V and electrical depression spike (-3 V, 50 ms).

## References

- [1] Curley, D.M.; Kumosinski, T.F.; Unruh, J.J. and Farrell Jr, H.M. Changes in the secondary structure of bovine casein by Fourier transform infrared spectroscopy: Effects of calcium and temperature, *J. Dairy Sci.* 1998, 81(12), pp.3154-3162.
- [2] Shao, F.; Cai, M.L.; Gu, X.F. and Wu, G.D. Starch as ion-based gate dielectric for oxide thin film transistors, *Org. Electron.* 2017, 45, pp.203-208.
- [3] Szyk-Warszyńska, L.; Raszka, K. and Warszyński, P. Interactions of casein and polypeptides in multilayer films studied by FTIR and molecular dynamics, *Polymers* 2019, 11(5), p.920.
